# Supplementary material for: Cation exchange reaction in Bi 2 S 3 nanorods enables the one-step fabrication of copper-64 nanoparticulate molecular PET imaging agents with ultrahigh radiolabel stability
Source: Royal Society of Chemistry journal article supplement (doi:10.1039/d5tb01591j), 2025-12-10
Supplement: d5tb01591j1.pdf [file d5tb01591j1.pdf]

**Cation Exchange Reaction in  $\text{Bi}_2\text{S}_3$  Nanorods Enables the One-Step Fabrication of Copper-64 Nanoparticulate Molecular PET Imaging Agents with Ultrahigh Radiolabel stability**

**Supplementary Information**

Original TEM image and ImageJ processed images are provided below. 8 different images at two different magnifications were processed to acquire the mean nanorod size by length and width

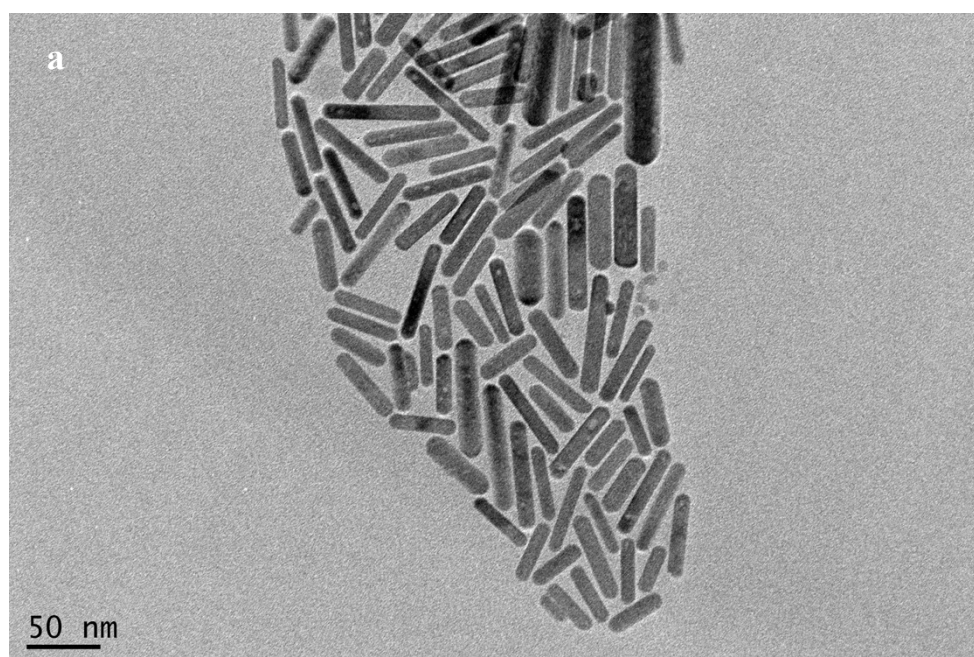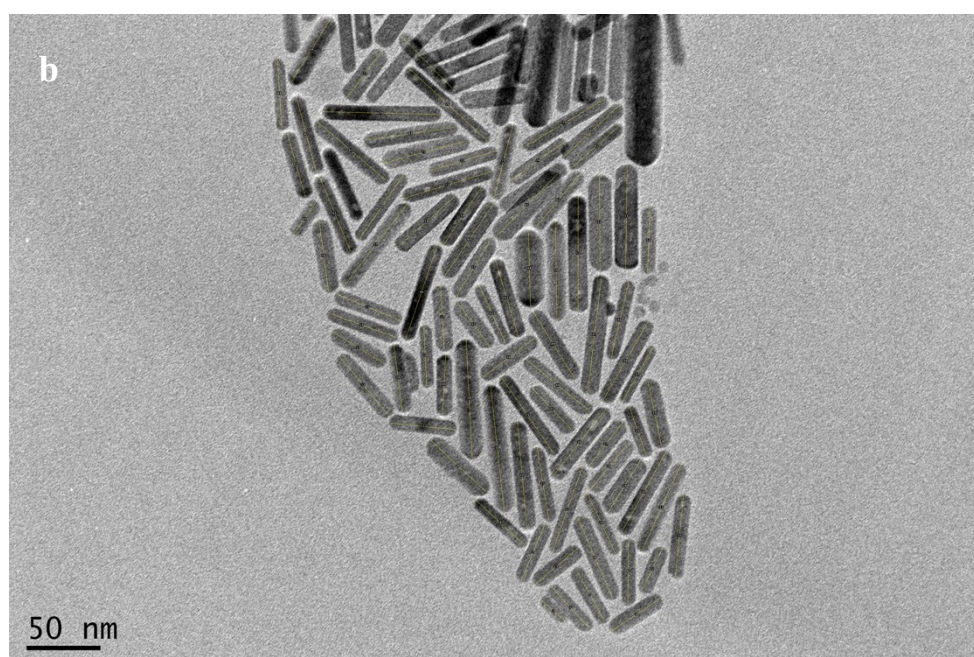

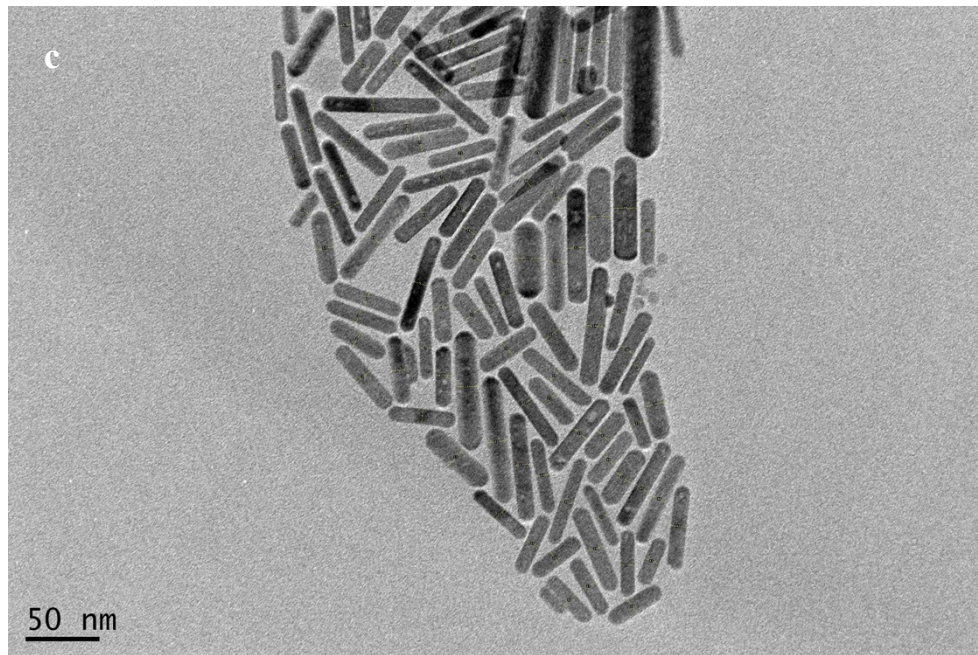

**Figure 1. Size distribution of  $\text{Bi}_2\text{S}_3$  nanorods by TEM.** a) Original TEM image; b) ImageJ processed image - length measurements; ; c) ImageJ processed image - width measurements.

Uncropped image of dot blot experiment. The experiment was performed using a serial dilution of Ab1 and Ab2. We used  $1\mu\text{g/mL}$ ,  $0.1\mu\text{g/mL}$ , and  $0.01\mu\text{g/mL}$ .

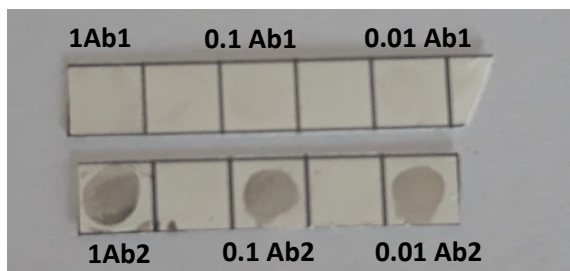

**Figure 2.** Uncropped image of dot blot experiment.

Uncropped imaging flow cytometry images used in the manuscript are provided. Object number is included. This enables referencing back to the original data file.



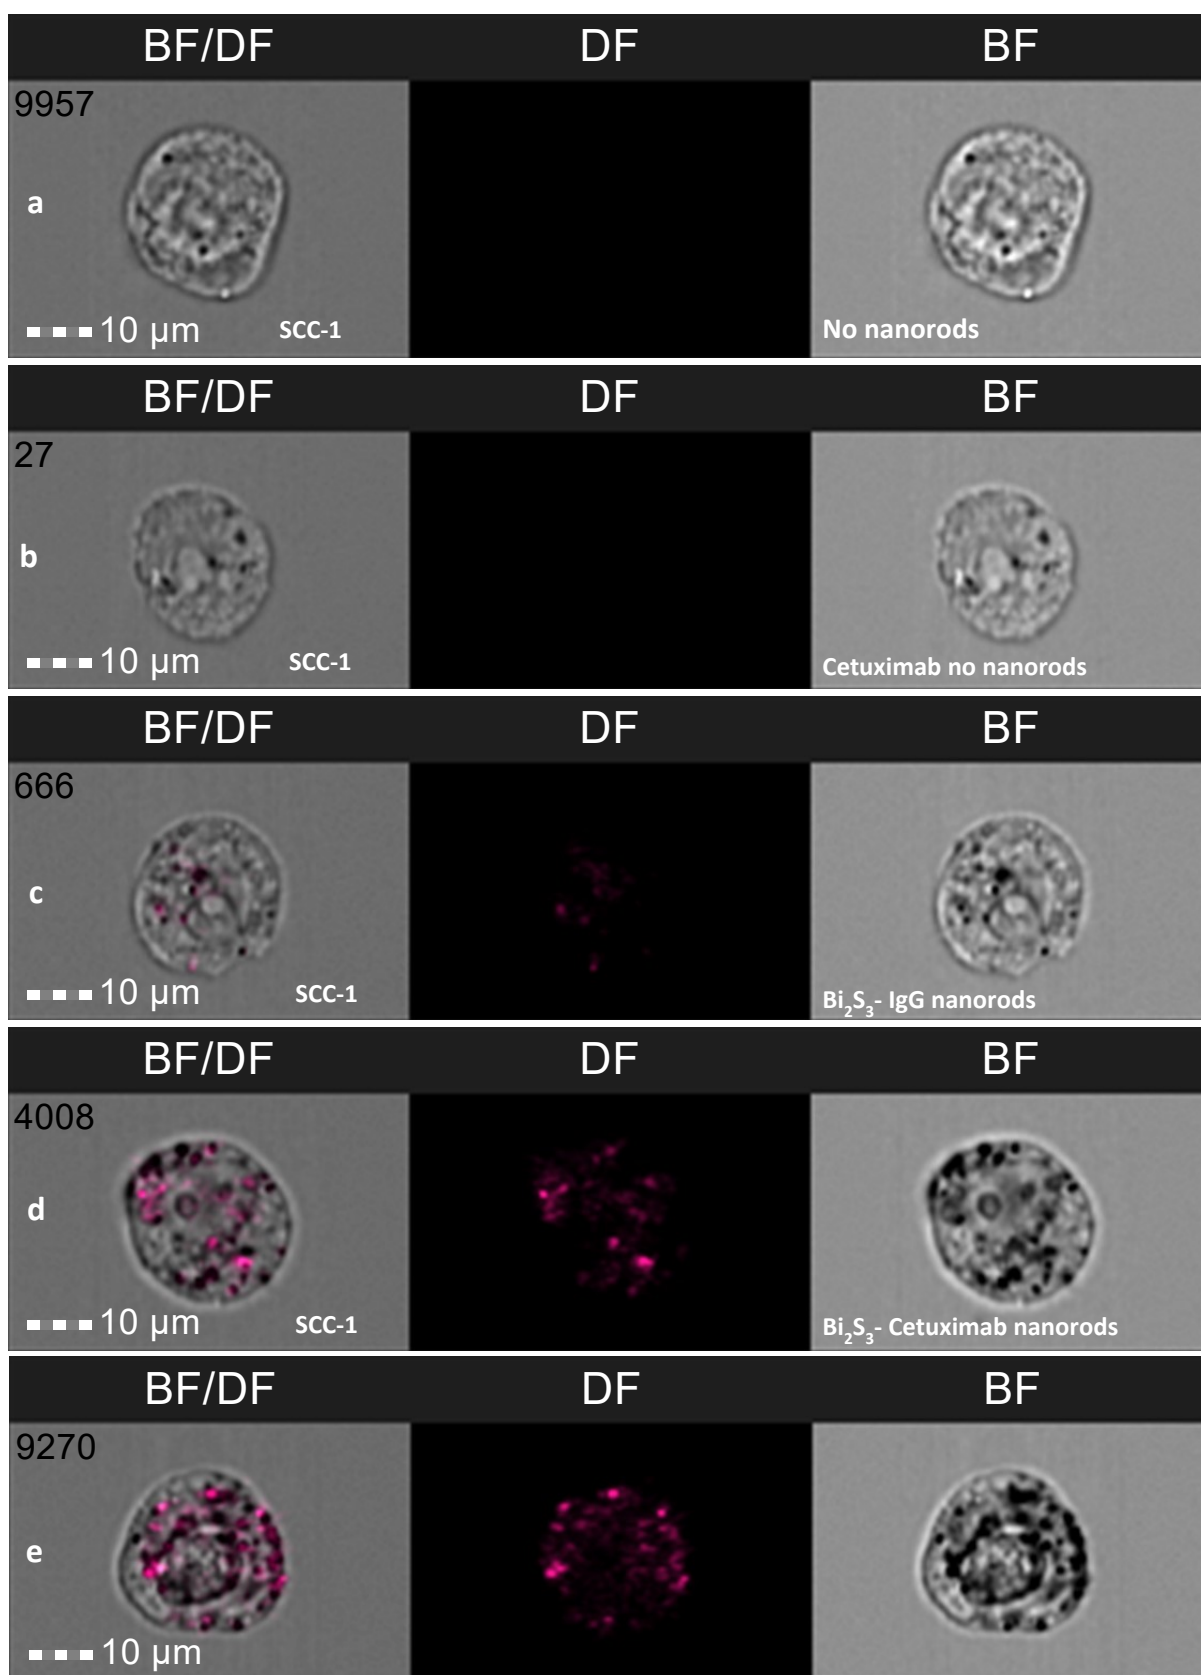

**Figure 3.** Uncropped ICF images. a) SCC-1 cells with no nanorods; b) SCC-1 cells with cetuximab; c) SCC-1 cells with  $\text{Bi}_2\text{S}_3$ -IgG nanorods; d) SCC-1 cells with  $\text{Bi}_2\text{S}_3$ -cetuximab nanorods; e) SCC-1 cells with Cu: $\text{Bi}_2\text{S}_3$ -cetuximab nanorods
